# Supplementary material for: Development of a genetically encodable FRET system using fluorescent RNA aptamers
Source: PubMed Central journal article supplement (PMC5750238; doi:10.1038/s41467-017-02435-x), 2018-01-02
Supplement: 41467_2017_2435_MOESM1_ESM.pdf [file 41467_2017_2435_MOESM1_ESM.pdf]

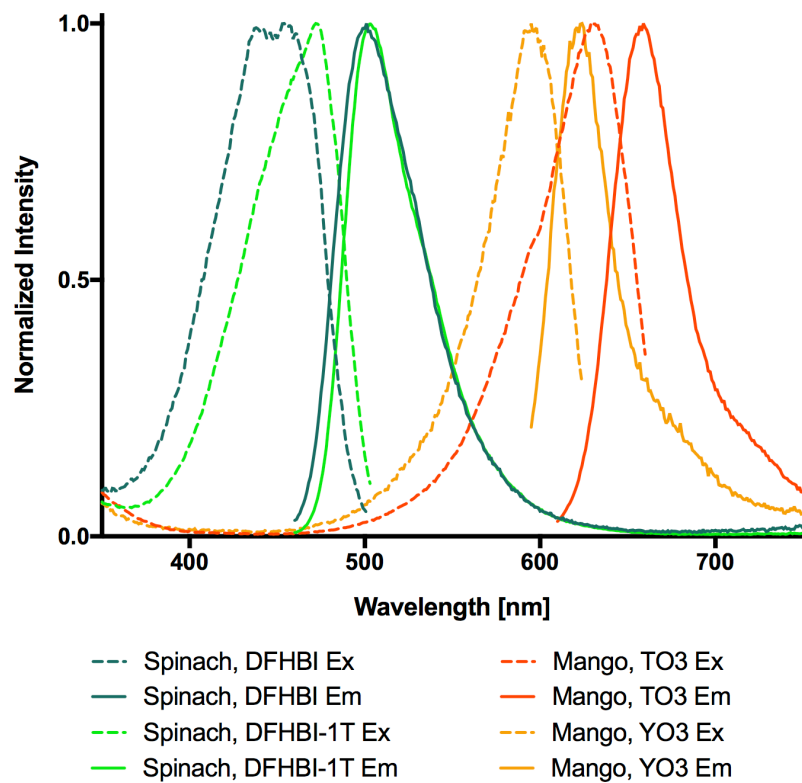

**Supplementary Figure 1: Excitation and emission spectra of fluorophores in aptamer constructs.** Excitation (dashed) and emission (solid) spectra of DFHBI in the Spinach construct (dark green), DFHBI-1T in the Spinach construct (light green), TO3-biotin in the Mango construct (red), and YO3-biotin in the Mango construct (orange). The excitation spectrum of DFHBI-1T is redshifted compared to DFHBI, whereas the emission spectrum is only redshifted with a couple of nanometers. The excitation spectrum of YO3-biotin is blueshifted with ~40 nm compared to TO3-biotin usually used in the Mango aptamer, giving YO3-biotin a 32% better spectral overlap with DFHBI-1T.

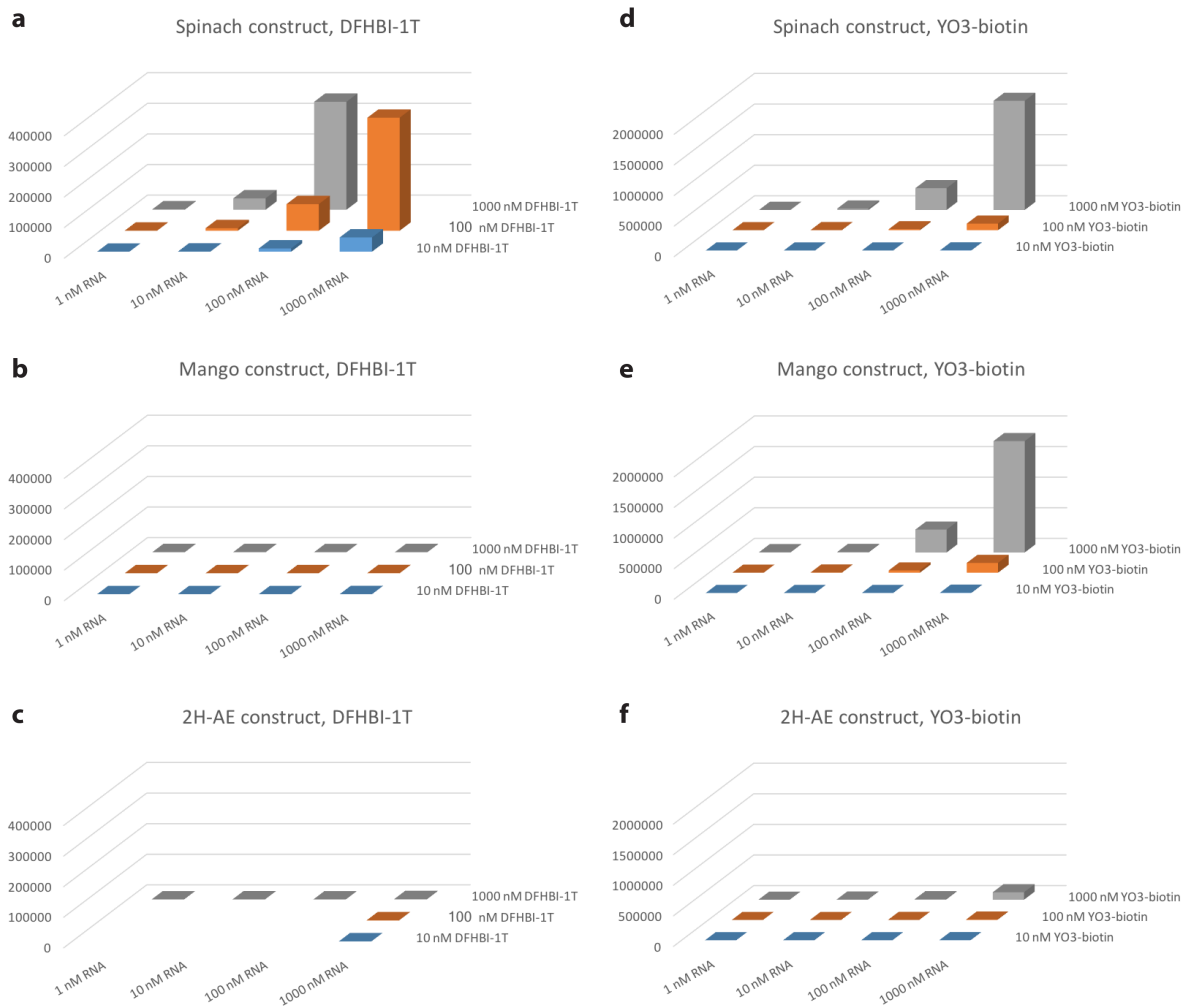

**Supplementary Figure 2: Binding assay of DFHBI-1T and YO3-biotin in Spinach, Mango, and 2H-AE constructs.** In all displayed results, background fluorescence arising from the fluorophores in the absence of aptamers (off-state fluorescence) was subtracted. **(a)** Increasing concentrations of the Spinach construct with increasing concentrations of DFHBI-1T. The fluorescence of the sample containing 1000 nM RNA and 1000 nM DFHBI-1T is not reported here, since self-quenching of the fluorescence was observed. The fluorescence intensity is seen to increase both as a function of increasing RNA concentration and as a function of DFHBI-1T concentration. **(b)** Increasing concentrations of the Mango construct with increasing concentrations of DFHBI-1T. No fluorescence is observed using any of the RNA or DFHBI-1T concentrations, indicating that DFHBI-1T is not activated by Mango. **(c)** Increasing concentrations of the basic unfunctionalized 2H-AE structure with increasing concentrations of DFHBI-1T. The unfunctionalized structure is unable to activate DFHBI-1T, shown by no observed fluorescence. **(d)** Increasing concentrations of the Spinach construct with increasing concentrations of YO3-biotin. YO3-biotin displays bright red fluorescence at 100 nM RNA and 1000 nM YO3-biotin, 1000 nM RNA and 100 nM YO3-biotin, and 1000 nM RNA and 1000 nM YO3-biotin. This means that Spinach is able to bind and activate YO3-biotin, and that Spinach is therefore not completely specific towards DFHBI and DFHBI-1T. **(e)** Increasing concentrations of the Mango construct with increasing concentrations of YO3-biotin. As was seen for YO3-biotin in the Spinach construct, YO3-biotin displays bright red fluorescence in the Mango construct. Surprisingly, the intensity of

the fluorescence emitted when YO3-biotin is bound in the Spinach construct is as high as when YO3-biotin is bound in the Mango construct. This indicates, that YO3-biotin is stabilized to the same degree and is equally efficient in emitting fluorescence when bound in Spinach as when bound in Mango. (f) Increasing concentrations of basic unmodified 2H-AE construct with increasing concentrations of YO3-biotin. Only at the highest RNA and fluorophore concentrations, a small amount of fluorescence is recorded. This indicates that YO3-biotin is able to bind unspecifically to RNA and be activated, however only with low efficiency as compared to the constructs carrying aptamers.

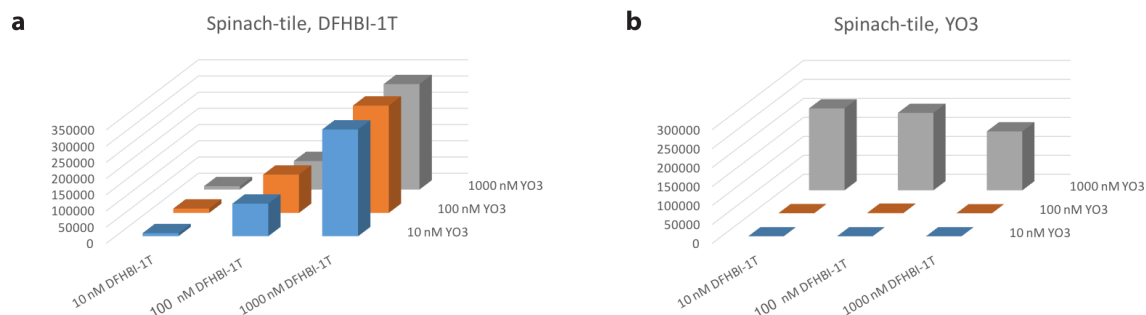

**Supplementary Figure 3: Competition assay of the fluorophores in the Spinach construct.** In all displayed results, background fluorescence arising from the fluorophores in the absence of aptamers (off-state fluorescence) was subtracted. 100 nM RNA was incubated with increasing amounts of DFHBI-1T and YO3-biotin. **(a)** The fluorescence from DFHBI-1T increases with DFHBI-1T concentration, and is unaffected by the presence of YO3-biotin. This indicates that YO3-biotin is unable to outcompete DFHBI-1T from Spinach using the tested concentrations of fluorophores. **(b)** The fluorescence from YO3-biotin increases with YO3-biotin concentration, and the intensity decreases with increasing concentrations of DFHBI-1T. This shows that DFHBI-1T is able to outcompete YO3-biotin from Spinach. Combined, the results show that Spinach preferably binds and activates DFHBI-1T when both fluorophores are present.

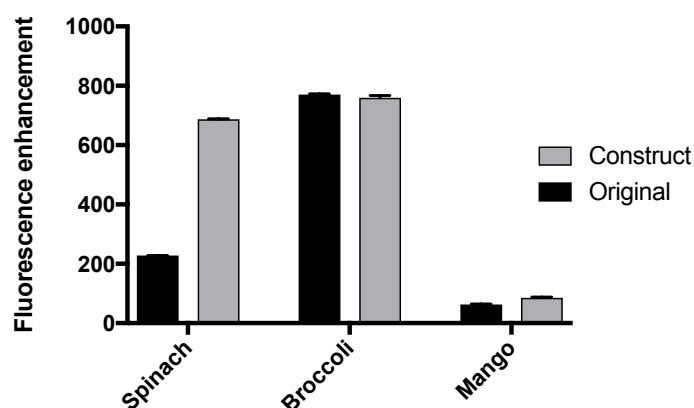

**Supplementary Figure 4: Fluorescence enhancement of the fluorophores in Spinach, Broccoli or Mango.** Fluorescence enhancement of DFHBI-1T in the minimal Spinach and Broccoli aptamers, in Spinach and Broccoli constructs, and of YO3-biotin in the minimal Mango aptamer and in a Mango construct (Supplementary Note 1). The fluorophore and RNA concentrations were 100 nM and 1  $\mu$ M, respectively and the fluorescence enhancements were calculated by dividing the fluorescence recorded from the fluorophore/aptamer complexes by the off-state emission from the fluorophores. It is evident that positioning the aptamers in RNA origami structures has a positive effect on the fluorescence enhancement. It is especially pronounced in the case of Spinach, where the fluorescence enhancement is more than 6 times higher in the construct than when using minimal Spinach. In the case of Broccoli, the fluorescence enhancement is the same in minimal Broccoli and in the Broccoli construct, and for Mango, the increases in fluorescence enhancement is  $\sim$ 1.3 times when placing the aptamer in the construct. In their minimal forms, Broccoli displayed a  $\sim$ 4X better fluorescence enhancement of DFHBI-1T than Spinach, however, once incorporated into the 2H-AE constructs, the fluorescence enhancements found for the two aptamers were almost the same. Error bars indicate standard deviations (n=3).

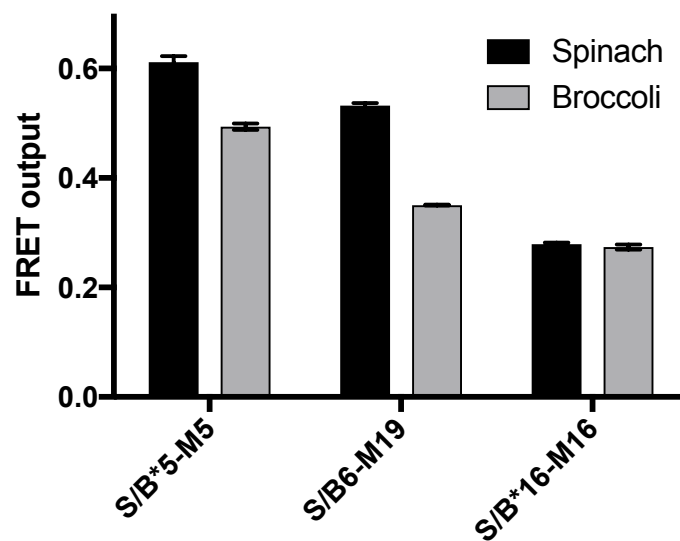

**Supplementary Figure 5: Examining the effect on FRET outputs of exchanging Spinach for Broccoli on otherwise identical apta-FRET structures.** FRET outputs of 6 different apta-FRET constructs; 2 series of 3 different structures, where one series includes Spinach as the donor aptamer, and the other series includes Broccoli as the donor aptamer. Generally, the FRET outputs are higher when using Spinach as the donor aptamer. For S/B6-M19, the FRET output is ~1.5 times higher in the apta-FRET construct containing Spinach than in the construct containing Broccoli. In the S/B\*5-M5 structures, the increase is ~1.2 times. However, in the S/B\*16-M16 constructs, the FRET outputs are nearly equal. As was seen in Supplementary Figure 4, incorporating the two aptamers into constructs seems to affect their fluorescence enhancement differently, which may be explained by the structures of the two aptamers being slightly different. This means that the orientations of the fluorophores may be somewhat altered in the structures, which is known to impact FRET.

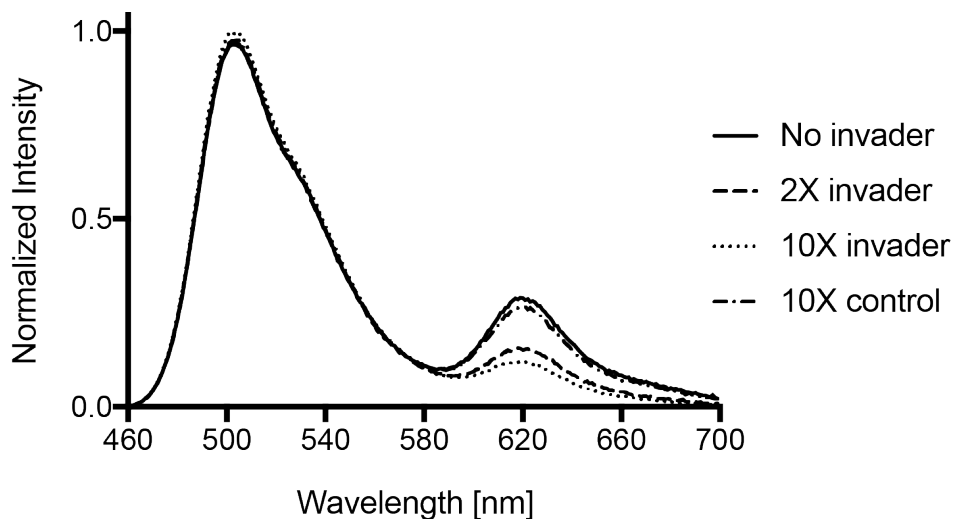

**Supplementary Figure 6: Fluorescence spectra of an apta-FRET system undergoing conformational changes by KL invasion.** The spectra before and after addition of the invader RNA (2X and 10X concentrations), including addition of an unrelated RNA sequence (10X control).

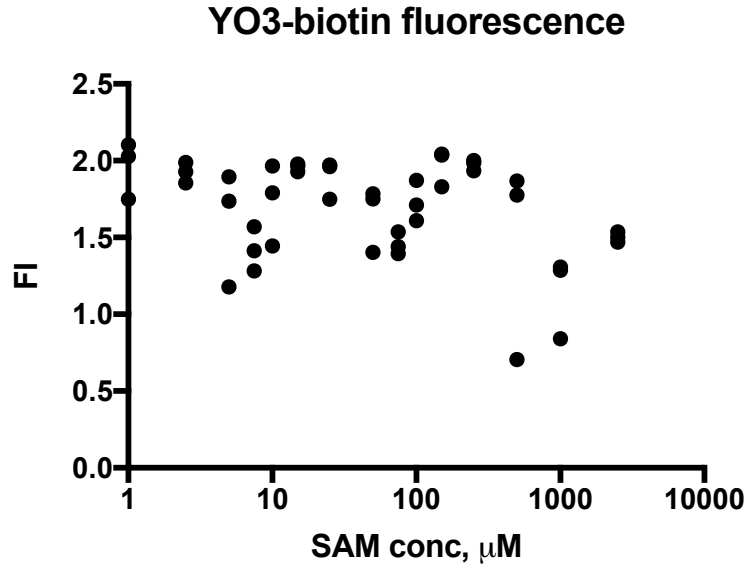

**Supplementary Figure 7: YO3-biotin fluorescence of the apta-FRET SAM sensor at different SAM concentrations.** Fluorescence intensity (FI) of YO3-biotin after excitation at YO3-biotin wavelength in the apta-FRET SAM sensor as a function of SAM concentration (shown as triplicates). The fluorescence from YO3-biotin is generally unaltered over the SAM concentration range tested, indicating that SAM does not influence the ability of YO3-biotin to bind in Mango. As seen, there are some periodic fluctuations in FI, and these have been found to be a consequence of inaccurate pipetting of the robot used to prepare the samples.



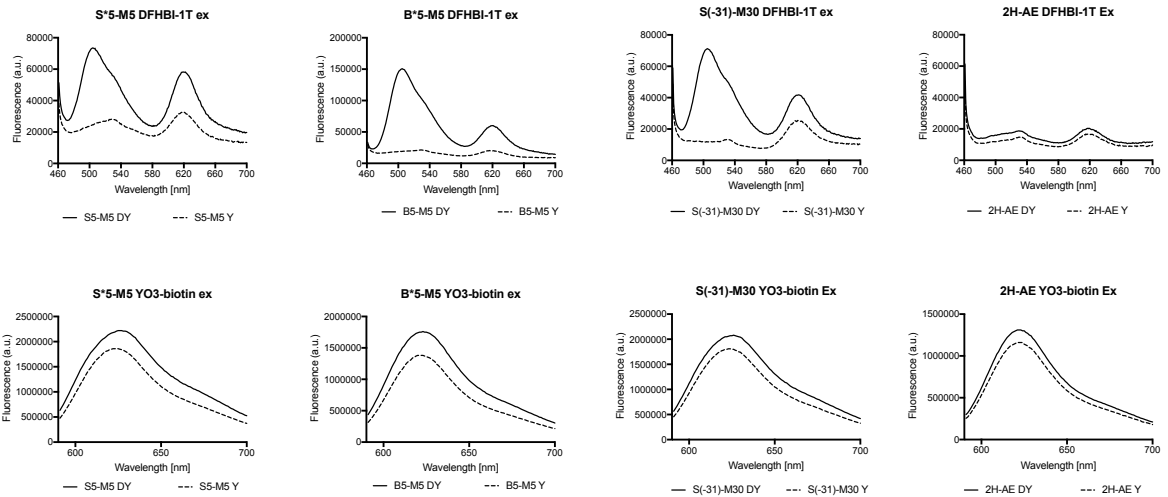

**Supplementary Figure 8: Fluorescence spectra of apta-FRET structures expressed in *E. coli*.** Fluorescence spectra recorded after excitation at DFHBI-1T wavelength (top) and after excitation at YO3-biotin wavelength (bottom). Solid lines represent cell samples in which both DFHBI-1T (D) and YO3-biotin (Y) were present, and the dotted lines represent cells in which only YO3-biotin was present. Extracted data are presented in Supplementary Table 2.

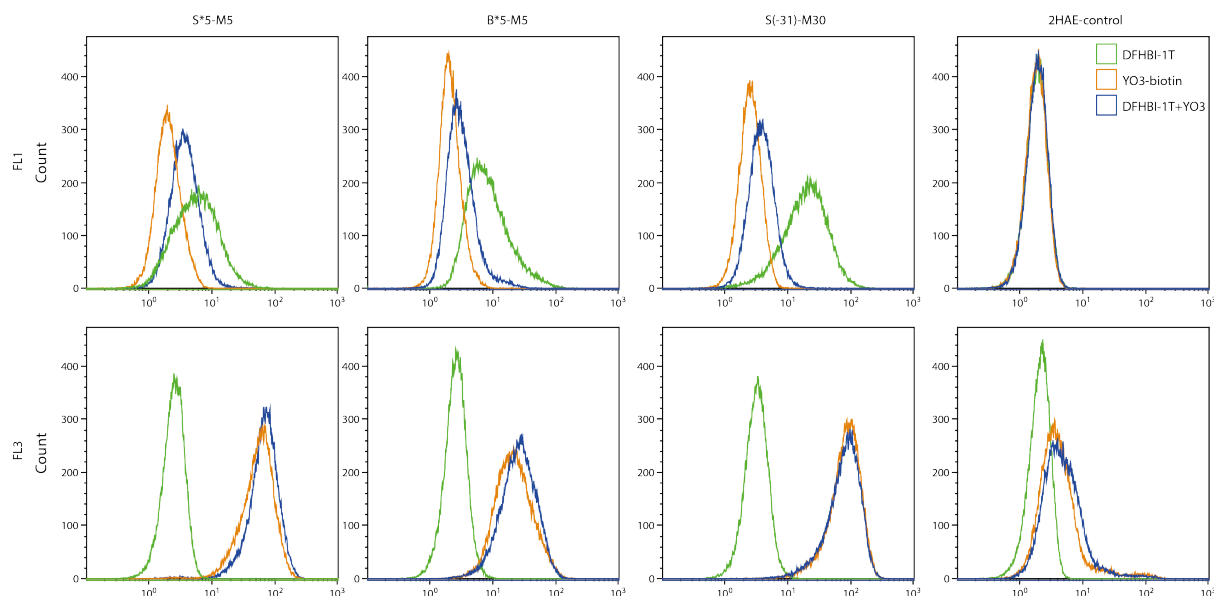

**Supplementary Figure 9: Flow cytometry of apta-FRET structures in *E. coli*.** Cell count as a function of fluorescence intensity of four different apta-FRET structures expressed in *E. coli*. Emission from cells containing either only DFHBI-1T (green), only YO3-biotin (orange) or both (blue) was recorded with the filter sets FL1 (corresponding to DFHBI-1T wavelength) and FL3 (corresponding to YO3-biotin wavelength) after DFHBI-1T excitation. In both S\*5-M5 and B\*5-M5 the FL3 intensity of cells containing both DFHBI-1T and YO3-biotin increases compared to cells containing only YO3-biotin, as would be expected if FRET occurred between DFHBI-1T and YO3-biotin. In the cells expressing S(-31)-M30, the FL3 intensity from cells containing only YO3-biotin is as high as cells containing both fluorophores, indicating that no FRET occurs. In the 2H-AE control cells, the fluorescence intensity is lower than in cells expressing the apta-FRET structures, and is a measure of the background fluorescence arising from unspecific binding of the fluorophores and their off-state fluorescence. Extracted data are presented in Supplementary Table 3.

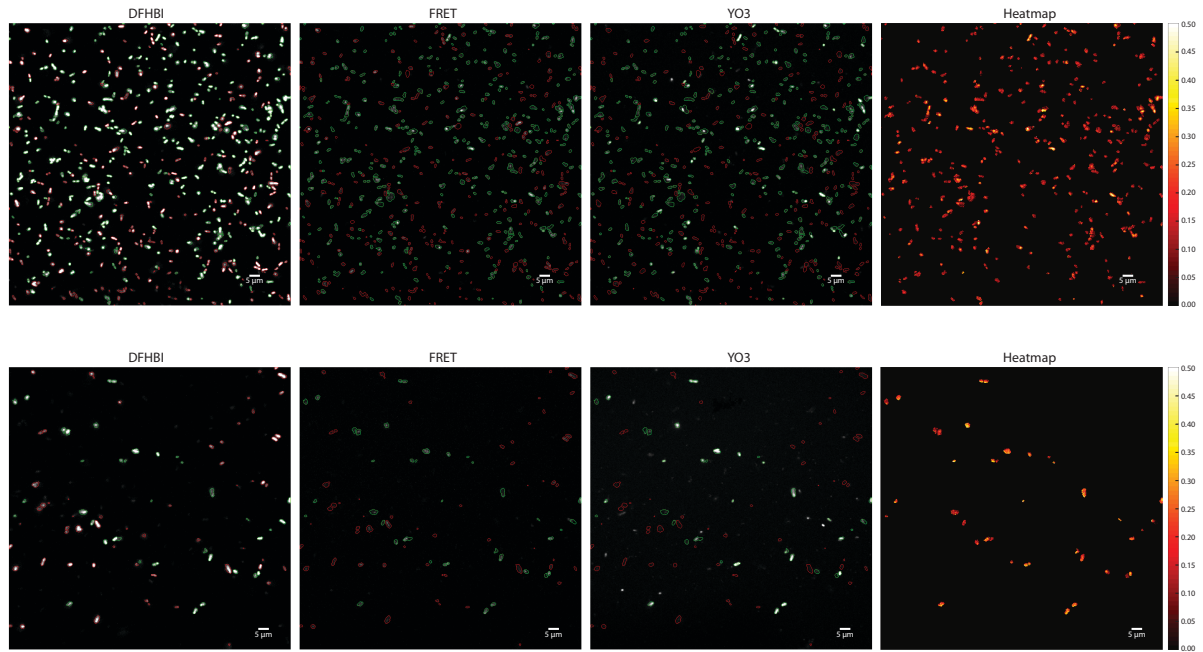

**Supplementary Figure 10: Single cell analysis of apta-FRET structures in *E. coli*.**

Fluorescence microscopy images of the S(-31)-M30 structure (top) and the S\*5-M5 structure (bottom). From the left are the three fluorescence channels DFHBI-1T, FRET, and YO3-biotin, and on the right is the calculated FRET heatmap of the gated cells. The location and boundaries of the cells were defined using the DFHBI-1T channel. The boundaries are marked with green for the selected cells and red for the deselected cells. The selection was based on the intensity of the directly excited YO3-biotin, where the bottom 5% was deselected, which corresponds to cells with no or very low YO3-biotin fluorescence. Although most cells show fluorescence from both DFHBI-1T and YO3-biotin, some cells show fluorescence from YO3-biotin but not DFHBI-1T, while others show fluorescence from DFHBI-1T but not YO3-biotin, which indicates that cell-to-cell variations in fluorophore concentrations occur.

|                  | Spinach construct |            | Broccoli construct |            | Mango construct |            |
|------------------|-------------------|------------|--------------------|------------|-----------------|------------|
| Fluorophore      | DFHBI-1T          | YO3-biotin | DFHBI-1T           | YO3-biotin | DFHBI-1T        | YO3-biotin |
| EC <sub>50</sub> | 337.5 nM          | 3.92 μM    | 598.9 nM           | 1.7 μM     | N/A             | 25.6 nM    |

**Supplementary Table 1: EC<sub>50</sub> of the DFHBI-1T and YO3-biotin in Spinach, Broccoli, and Mango constructs.** EC<sub>50</sub> was determined as described in the experimental section. EC<sub>50</sub> of DFHBI-1T in the Spinach construct is lower than in the Broccoli construct, indicating the affinity for DFHBI-1T is higher in Spinach than in Broccoli. No EC<sub>50</sub> of DFHBI-1T in the Mango construct could be found, since the aptamer does not bind this fluorophore. The EC<sub>50</sub> of YO3-biotin in the Mango construct is very low, indicating that the binding affinity is very strong. Furthermore, when comparing the EC<sub>50</sub>s of both fluorophores in the Spinach or Broccoli construct, it is seen that the values are much smaller for DFHBI-1T than YO3-biotin. Together with the very low EC<sub>50</sub> of YO3-biotin in Mango, these findings show that Spinach and Broccoli preferentially binds DFHBI-1T, whereas Mango only binds YO3-biotin. This suggests that the ability of YO3-biotin to bind in Spinach and Broccoli will not be problematic when it comes to performing FRET measurements, because DFHBI-1T is preferentially bound and even at low concentrations, YO3-biotin will be bound in Mango instead. Besides, DFHBI-1T outcompetes YO3-biotin in Spinach (Supplementary Fig. 3).

**a**

|                   | $I_D(ex_D, em_D)$ | $I_D(ex_D, em_Y)$ | $I_Y(ex_D, em_Y)$ | $I_Y(ex_Y, em_Y)$ | $I_{DY}(ex_D, em_D)$ | $I_{DY}(ex_D, em_Y)$ | $I_{DY}(ex_Y, em_Y)$ |
|-------------------|-------------------|-------------------|-------------------|-------------------|----------------------|----------------------|----------------------|
| <b>S*5-M5</b>     | 186033            | 12131             | 32755             | 1838960           | 73202                | 58131                | 2153090              |
| <b>B*5-M5</b>     | 143318            | 15122             | 19790             | 1375120           | 149371               | 60057                | 1744410              |
| <b>S(-31)-M30</b> | 180202            | 9244              | 25432             | 1784520           | 70980                | 41734                | 2028980              |
| <b>2H-AE</b>      | -                 | -                 | 16458             | 1158330           | 16320                | 19876                | 1308070              |

**b**

|                   | $A_{dir}$ | $D_{leak}$ | FRET output |
|-------------------|-----------|------------|-------------|
| <b>S*5-M5</b>     | 1.781 %   | 6.52 %     | 0.218       |
| <b>B*5-M5</b>     | 1.439 %   | 10.55 %    | 0.133       |
| <b>S(-31)-M30</b> | 1.425 %   | 5.13 %     | 0.079       |
| <b>2H-AE</b>      | 1.421 %   | -          | -           |
| <b>Average</b>    | 1.516 %   | 7.40 %     | -           |

**Supplementary Table 2: Fluorescence intensities from *in vivo* spectrofluorometric measurements and FRET calculations.** (a) Fluorescence intensities extracted from the spectra displayed in Figure S7.  $I_D$ ,  $I_Y$ , and  $I_{DY}$  refer to the intensities in the presence of DFHBI-1T, YO3-biotin, and both DFHBI-1T and YO3-biotin, respectively. The excitation at DFHBI-1T or YO3-biotin wavelength is denoted with  $ex_D$  or  $ex_Y$ , respectively. The emission measured at DFHBI-1T or YO3-biotin wavelength is denoted with  $em_D$  or  $em_Y$ , respectively.

(b) Calculations of  $A_{dir}$ ,  $D_{leak}$ , and FRET output.  $A_{dir}$  was calculated as  $A_{dir} = \frac{I_Y(ex_D, em_Y)}{I_Y(ex_Y, em_Y)}$  and found to be 1.5 % on average, and  $D_{leak}$  was calculated as  $D_{leak} = \frac{I_D(ex_D, em_D)}{I_D(ex_D, em_Y)}$  and found to be 7.4 % on average. The FRET output was calculated as  $FRET = \frac{I_{DY}(ex_D, em_Y) - 0.015 * I_{DY}(ex_Y, em_Y) - 0.074 * I_{DY}(ex_D, em_D)}{I_{DY}(ex_D, em_Y) - 0.015 * I_{DY}(ex_Y, em_Y) - 0.074 * I_{DY}(ex_D, em_D) + I_{DY}(ex_D, em_D)}$  (see Materials and Methods for further explanation). The FRET output for the 2H-AE construct (marked with an asterisk) was calculated without subtracting  $D_{leak}$ , since the donor, DFHBI-1T, does not fluoresce in this sample.

**a**

|               | Number | % of total | FL1 <sub>min</sub> | FL1 <sub>max</sub> | FL1 Mean <sub>Geo</sub> | FL1 Stdev |
|---------------|--------|------------|--------------------|--------------------|-------------------------|-----------|
| S*5-M5 D      | 39,885 | 79.77      | 0.25               | 136.98             | 5.08                    | 6.62      |
| S*5-M5 Y      | 39,629 | 79.26      | 0.16               | 10.42              | 1.94                    | 1.07      |
| S*5-M5 DY     | 40,021 | 80.04      | 0.30               | 76.55              | 3.54                    | 2.67      |
| B*5-M5 D      | 44,274 | 88.55      | 0.02               | 214.56             | 7.85                    | 12.49     |
| B*5-M5 Y      | 43,174 | 86.35      | 0.13               | 20.12              | 2.02                    | 0.98      |
| B*5-M5 DY     | 43,550 | 87.10      | 0.25               | 58.97              | 3.00                    | 2.94      |
| S(-31)-M30 D  | 40,806 | 81.61      | 0.26               | 231.46             | 17.21                   | 19.76     |
| S(-31)-M30 Y  | 41,167 | 82.33      | 0.35               | 26.73              | 2.43                    | 1.08      |
| S(-31)-M30 DY | 38,715 | 77.43      | 0.28               | 86.93              | 3.68                    | 2.24      |
| 2H-AE D       | 44,198 | 88.40      | 0.14               | 7.78               | 1.77                    | 0.75      |
| 2H-AE Y       | 44,506 | 89.01      | 0.17               | 10.60              | 1.73                    | 0.71      |
| 2H-AE DY      | 44,570 | 89.14      | 0.17               | 7.98               | 1.81                    | 0.75      |

**b**

|               | Number | % of total | FL3 <sub>min</sub> | FL3 <sub>max</sub> | FL3 Mean <sub>Geo</sub> | FL3 Stdev |
|---------------|--------|------------|--------------------|--------------------|-------------------------|-----------|
| S*5-M5 D      | 39,885 | 79.77      | 0.24               | 104.29             | 2.36                    | 1.49      |
| S*5-M5 Y      | 39,629 | 79.26      | 0.66               | 316.06             | 50.73                   | 33.36     |
| S*5-M5 DY     | 40,021 | 80.04      | 0.63               | 353.71             | 62.91                   | 37.18     |
| B*5-M5 D      | 44,274 | 88.55      | 0.20               | 15.84              | 2.46                    | 1.14      |
| B*5-M5 Y      | 43,174 | 86.35      | 0.38               | 370.40             | 20.44                   | 19.58     |
| B*5-M5 DY     | 43,550 | 87.10      | 0.77               | 341.51             | 24.00                   | 19.16     |
| S(-31)-M30 D  | 40,806 | 81.61      | 0.16               | 89.51              | 3.05                    | 1.71      |
| S(-31)-M30 Y  | 41,167 | 82.33      | 1.06               | 394.70             | 76.47                   | 46.46     |
| S(-31)-M30 DY | 38,715 | 77.43      | 0.61               | 422.77             | 72.18                   | 46.96     |
| 2H-AE D       | 44,198 | 88.40      | 0.16               | 6.76               | 1.95                    | 0.81      |
| 2H-AE Y       | 44,506 | 89.01      | 0.26               | 309.11             | 3.87                    | 14.30     |
| 2H-AE DY      | 44,570 | 89.14      | 0.20               | 241.91             | 4.44                    | 11.68     |

**C**

|                   | FL1 D | FL1 DY | FL3 D | FL3 Y | FL3 DY | D <sub>leak</sub> | FRET output |
|-------------------|-------|--------|-------|-------|--------|-------------------|-------------|
| <b>S*5-M5</b>     | 3.29  | 1.71   | 0.4   | 46.83 | 58.4   | 12.16 %           | 0.870       |
| <b>B*5-M5</b>     | 6.06  | 1.17   | 0.5   | 16.54 | 19.49  | 8.25 %            | 0.708       |
| <b>S(-31)-M30</b> | 15.42 | 1.85   | 1.09  | 72.57 | 67.67  | 7.07 %            | 1.607 *     |

**Supplementary Table 3: Fluorescence intensities from *in vivo* flow cytometry**

**measurements and FRET calculations.** (a) Fluorescence intensities at DFHBI-1T emission wavelength after excitation at DFHBI-1T wavelength from the measurements displayed in Supplementary Figure 8. “Number” and “% of total” denotes the number of cells and percentage of the total number of cells included in the displayed intensities, respectively. FL1<sub>min</sub> and FL1<sub>max</sub> are the minimum and maximum intensities recorded from the cells, respectively. FL1 Mean<sub>Geo</sub> and FL1 Stdev are the geometric mean intensity and the standard deviation, respectively. (b) Fluorescence intensities at YO3-biotin emission wavelength after excitation at DFHBI-1T wavelength from the measurements displayed in Supplementary Figure 8. (c) FL1 and FL3 geometric mean intensities after subtraction of 2H-AE

background.  $D_{leak}$  was calculated as  $D_{leak} = \frac{FL3_D}{FL1_D}$  and found to be 9.15 % on average. The FRET output was calculated as  $FRET = \frac{FL3_{DY} - FL3_Y - 0.09 * FL1_{DY}}{FL3_{DY} - FL3_Y - 0.09 * FL1_{DY} + FL1_{DY}}$ . The FRET output for the S(-31)-M30 tile (marked with an asterisks) is above 1, since the geometric mean intensity of the cells only containing YO3-biotin (Y) was higher than the intensity of the cells containing both DFHBI-1T and YO3-biotin (DY). This means, that due to the way FRET is calculated, two negative numbers are divided by each other, giving rise to a positive number above 1. However, FRET can only take values between 0 and 1, and when inspecting the spectra from flow cytometry in Figure S8, and the standard deviations in relation to the measured intensities displayed in the table below, it becomes apparent that the FRET output is effectively zero.









S17-M26

GGGAGAU... GGCAGG... AACGUUCUGUGAAGCCGAC... CCUGGCA... GCCUCC... GU-GGUCC... CCGAUUAGUAGGC...
CGGUCGCUACCGG-UU-GA-GUAGAGUGUGAGGCAAGGCACUUUGGCUG... GGACUG... CCGAGG... ACG-CCAGC... GGCUAGUCAUU...
CGU-GG-CAG-GG-AAG-CCGUAGCUUGCUUGGUCGGUCAGAU... CUAGGAUGACG... CCCUCUGGCUC... GCUGAGGGCUGGC...
GG-AGA-GG-AGA-GGCUGCGAACGGACCAGCUAGUUUAG... GAUUCUAUUGC3 5GGGAGAUCCGAG-CGACUCCGACUU

S17-M28

GGGAGAU... GGCAGG... AACGUUCUGUGAAGCCGAC... CCUGGCA... GCCUCC... GU-GGUCC... CCGAUUAGUAGGC...
CGGUCGCUACCGG-UU-GA-GUAGAGUGUGAGGCAAGGCACUUUGGCUG... GGACUG... CCGAGG... ACG-CCAGC... GGCUAGUCAUU...
CGU-GG-CAG-GG-AAG-CCGCAUAGCUUGCUUGGUCGGUCAGAU... CUAGGAUGACG... CCCUCUGGCUC... GCUGAGGGCUGGC...
GG-AGA-GG-AGA-GGCUGCGAACGGACCAGCUAGUUUAG... GAUUCUAUUGC3 5GGGAGAUCCGAG-CGACUCCGACUU

S17-M30

GGGAGAU... GGCAGG... AACGUUCUGUGAAGCCGAC... CCUGGCA... GCCUCC... GU-GGUCC... CCGAUUAGUAGGC...
CGGUCGCUACCGG-UU-GA-GUAGAGUGUGAGGCAAGGCACUUUGGCUG... GGACUG... CCGAGG... ACG-CCAGC... GGCUAGUCAUU...
CGU-GG-CAG-GG-AAG-CGACGCAUAGCUUGCUUGGUCGGUCAGAU... CUAGGAUGACG... CCCUCUGGCUC... GCUGAGGGCUGGC...
GG-AGA-GG-AGA-GCUGCGUGUCGAAACGGACCAGCUAGUUUAG... GAUUCUAUUGC3 5GGGAGAUCCGAG-CGACUCCGACUU

S\*16-M14

GGGAGAU... GGCAGG... AACGUUCUGUGAAGCCGAC... CCUGGCA... GCCUCC... GU-GGCAG... CGGAGGCCUUGGC...
CGGUCGCUACCGG-UU-GA-GUAGAGUGUGAGGCAAGGCACUUUGGCUG... GGACUG... CCGAGG... ACG-CCAGC... GGCUAGUCAUU...
CGU-GG-CAG-GG-AAG-CGAGUUCACGGAC... CCGGUGCGACG... CCCUCUGGAGC... GGUCAUUACAGGC...
GG-AGA-GG-AGA-GCUGCGUGUCGAAACGGACCAGCUAGUUUAG... GAUUCUAUUGC3 5GGGAGAUCCGAG-CGACUCCGACUU













## Supplementary Note 2: DNA sequences for the RNA structures.

Forward primer for all designs (except 2H-AE, Fwd primer is noted with sequence):

> Universal\_Fwd  
CACTTTCAGCCCTCTTATCCT

Templates (dsDNA gBlocks) and reverse primers for single aptamer constructs:

> Minimal Spinach  
CACTTTCAGCCCTCTTATCCTCGGGCGGATCCTTCTAATACGACTCACTATAGGATGTAAGTGAATGAAATGGTGA  
AGGACGGGTCCAGTAGGCTGCTTCGGCAGCCTACTTGTGAGTAGAGTGTGAGCTCCGTAAGTACATCC  
> Rev-Simple-Spinach  
GGATGTAAGTACGAGCTC

> Minimal Broccoli  
CACTTTCAGCCCTCTTATCCTCGGGCGGATCCTTCTAATACGACTCACTATAGGCCCGATAGCTCAGTCGGTAGA  
GCAGCGGAGACGGTCGGGTCCAGATATTCGTATCTGTCGAGTAGAGTGTGGGCTCCGCGGTCCAGGGTTCAAGT  
CCCTGTTCCGGCGCCA  
> Rev-Simple-Broccoli  
TGGCGCCCGAACAGG

> Minimal Mango  
CACTTTCAGCCCTCTTATCCTCGGGCGGATCCTTCTAATACGACTCACTATAGGATGCGTAACCCTCAAGGAACCC  
GCAAGCCATCGGGACTCAAGCCGCCGGTACCTCCGAAGGGACGGTGCGGAGAGGAGAGGGGGCACTGGGCGGCTG  
TGTGAGATTCTGCCAAATAGACAGCCGAA  
> Rev-Simple-Mango  
TTCGGCTGTCTATTTGGCAG

> 2H-AE construct  
TTCTAATACGACTCACTATAAGGAATTCAGGAGCTCGGGAGCGTCCACTGCTCCTGAGCGCTCCAGTGGACGGAGC  
CCTGGTGAAGCCTCCACGCCAGGTCCTGGATTCCGCATGTATCGAGGACTGAAGGAGGCACGGTCCCACGGGCTC  
CGAGACGTGGAGTCCGTGTCCGCACGTCTCGCGGATCGATGCATGC  
> Fwd-2H-AE  
TTCTAATACGACTCACTATAGGAA  
> Rev-2H-AE  
GCATGCATCGATCCGCG

> Spinach construct  
CACTTTCAGCCCTCTTATCCTCGGGCGGATCCTTCTAATACGACTCACTATAGGGAGATGCTCCAGTTACATTCG  
TGTAAGTGGCCGTGCGGTAAGGACGGGTCCCTAGCTAATTCGTTAGTTAGGTTGAGTAGAGTGTGAGACCGTACG  
GGCTGGTGAAGCCTCCACGCCAGCGAGCGTCTCCCGCATGGCAACGCGACTGAAGGAGGCACGGTCCGGCCATCGG  
TTTCGACCGGTGGCGGTAGAGCCTTCGGGCTTTACCCGTTGTCATGC  
> Rev-Spinach-construct  
GCATGACAACGGGTAAAGC

> Broccoli construct  
CACTTTTAGCCCTCTTATCCTCGGGCGAATTCTTCTAATACGACTCACTATAGGGAGATGCTCCCAGTTACATTCG  
TGTAGCTGGCCGTGCGAGACGGTCCGATAGCTAATTCGTTAGTTATGTCGAGTAGAGTGTGGGCTCGTACG  
GGGTGGTGAAGCCTCCACGCCACCGAGCGTCTCCCGCATGGCAACGCGACTGAAGGAGGCACGGTCGGCCATCCG  
TTTCGACGGGTGGCGGTAGAGCCTTCGGGCTTTACCCGTTGTCATGCAACCCCGCGGGGCTCTTCGGGGTCTC  
GCGGGGTTTTTGTCTCGTAGGATCCCTTAACCACCACCAACCTACT  
> Rev-Broccoli-construct  
CGTAGAATTGCATGACAACGGGTAAAGC

> Mango construct  
CACTTTTAGCCCTCTTATCCTCGGGCGGATCCTTCTAATACGACTCACTATAGGGAGATCGTCCTAAGCGCTTTCG  
AGCGTTTAGCCTGGGTGCGAAGGGACGGTTCGGAGAGGAGAGCGACTCAGGGATGGTGAAGCCTCCACGCCATC  
GACGGTCTCCCGATACTCATCGCGACTGAAGGAGGCACGGTCGGCATTTGTACTTCGGTACGATGCGCAAGCGACT  
TCGGTTCGTTTGCCGATGGGTATC  
> Rev-Mango-construct  
GATACCCATCGGCAAACG

**Templates (dsDNA gBlocks) and reverse primers for apta-FRET constructs with regular Spinach:**

> S17-M30  
CACTTTTAGCCCTCTTATCCTCGGGCGGATCCTTCTAATACGACTCACTATAGGGAGATCGAGCGACTTCCGACTT  
CGGTTCGGGAGTTCGGGCTAGTCATCTTCGGATGATTAGCCGCTGGTGAAGCCTCCACGCCAGCCTCGGTCTCCCGC  
AGTAGGATCGGACTGAAGGAGGCACGGTCCCAGCCGAAAGTGTCTTGCAAGGACGGGTCCCGGTGGCGACTTCGGT  
CGCTACCGGTTGAGTAGAGTGTGAGGCAAGGCACTTTGGCTGCTAGACTGGCTGGTTCGTTTCGATACGCAGCGAA  
GGGACGGTTCGGAGAGGAGAGCTGCGTGTGCAACGGACCAGCTAGTTTAGGATTCTATTGC  
> rev\_S17  
GCAATAGAATCCTAAACTAGCTGG

> S17-M28  
CACTTTTAGCCCTCTTATCCTCGGGCGGATCCTTCTAATACGACTCACTATAGGGAGATCGAGCGACTTCCGACTT  
CGGTTCGGGAGTTCGGGCTAGTCATCTTCGGATGATTAGCCGCTGGTGAAGCCTCCACGCCAGCCTCGGTCTCCCGC  
AGTAGGATCGGACTGAAGGAGGCACGGTCCCAGCCGAAAGTGTCTTGCAAGGACGGGTCCCGGTGGCGACTTCGGT  
CGCTACCGGTTGAGTAGAGTGTGAGGCAAGGCACTTTGGCTGCTAGACTGGCTGGTTCGTTTCGATACGCCAAGG  
GACGGTTCGGAGAGGAGAGGCGTGTGCAACGGACCAGCTAGTTTAGGATTCTATTGC  
> rev\_S17  
GCAATAGAATCCTAAACTAGCTGG

> S17-M26  
CACTTTTAGCCCTCTTATCCTCGGGCGGATCCTTCTAATACGACTCACTATAGGGAGATCGAGCGACTTCCGACTT  
CGGTTCGGGAGTTCGGGCTAGTCATCTTCGGATGATTAGCCGCTGGTGAAGCCTCCACGCCAGCCTCGGTCTCCCGC  
AGTAGGATCGGACTGAAGGAGGCACGGTCCCAGCCGAAAGTGTCTTGCAAGGACGGGTCCCGGTGGCGACTTCGGT  
CGCTACCGGTTGAGTAGAGTGTGAGGCAAGGCACTTTGGCTGCTAGACTGGCTGGTTCGTTTCGATGCCGAAGGGA  
CGGTTCGGAGAGGAGAGGCGTGTGCAACGGACCAGCTAGTTTAGGATTCTATTGC  
> rev\_S17  
GCAATAGAATCCTAAACTAGCTGG

> S17-M24  
CACTTTTAGCCCTCTTATCCTCGGGCGGATCCTTCTAATACGACTCACTATAGGGAGATCGAGCGACTTCCGACTT  
CGGTTCGGGAGTTCGGGCTAGTCATCTTCGGATGATTAGCCGCTGGTGAAGCCTCCACGCCAGCCTCGGTCTCCCGC  
AGTAGGATCGGACTGAAGGAGGCACGGTCCCAGCCGAAAGTGTCTTGCAAGGACGGGTCCCGGTGGCGACTTCGGT  
CGCTACCGGTTGAGTAGAGTGTGAGGCAAGGCACTTTGGCTGCTAGACTGGCTGGTTCGTTTCGATGCCGAAGGAC  
GTGCGGAGAGGAGAGGCGGAACGGACCAGCTAGTTTAGGATTCTATTGC  
> rev\_S17  
GCAATAGAATCCTAAACTAGCTGG

> S17-M22  
CACTTTCAGCCCTCTTATCCTCGGCGGATCCTTCTAATACGACTCACTATAGGGAGATCGAGCGACTTCCGACTT  
CGGTCGGGAGTCGGGCTAGTCATCTTCGGATGATTAGCCGCTGGTGAAGCCTCCACGCCAGCCTCGGTCTCCCGC  
AGTAGGATCGGACTGAAGGAGGCACGGTCCCAGCCGAAGTGTCTTGCAAGGACGGGTCCCGGTGGCGACTTCGGT  
CGCTACCGGTTGAGTAGAGTGTGAGGCAAGGCACTTTGGCTGCTAGACTGGCTGGTTCGTTGCCGAAGGGACGGT  
GCGGAGAGGAGAGGCAACGGACCCAGCTAGTTTAGGATTCTATTGC  
> rev\_S17  
GCAATAGAATCCTAAACTAGCTGG

> S17-M20  
CACTTTCAGCCCTCTTATCCTCGGCGGATCCTTCTAATACGACTCACTATAGGGAGATCGAGCGACTTCCGACTT  
CGGTCGGGAGTCGGGCTAGTCATCTTCGGATGATTAGCCGCTGGTGAAGCCTCCACGCCAGCCTCGGTCTCCCGC  
AGTAGGATCGGACTGAAGGAGGCACGGTCCCAGCCGAAGTGTCTTGCAAGGACGGGTCCCGGTGGCGACTTCGGT  
CGCTACCGGTTGAGTAGAGTGTGAGGCAAGGCACTTTGGCTGCTAGACTGGCTGGTTCGTTGCCGAAGGGACGGTGC  
GGAGAGGAGAGGCAGGACCCAGCTAGTTTAGGATTCTATTGC  
> rev\_S17  
GCAATAGAATCCTAAACTAGCTGG

> S17-M18  
CACTTTCAGCCCTCTTATCCTCGGCGGATCCTTCTAATACGACTCACTATAGGGAGATCGAGCGACTTCCGACTT  
CGGTCGGGAGTCGGGCTAGTCATCTTCGGATGATTAGCCGCTGGTGAAGCCTCCACGCCAGCCTCGGTCTCCCGC  
AGTAGGATCGGACTGAAGGAGGCACGGTCCCAGCCGAAGTGTCTTGCAAGGACGGGTCCCGGTGGCGACTTCGGT  
CGCTACCGGTTGAGTAGAGTGTGAGGCAAGGCACTTTGGCTGCTAGACTGGCTGGTTCGTTGCCGAAGGGACGGTGC  
AGAGGAGAGGCGACCCAGCTAGTTTAGGATTCTATTGC  
> rev\_S17  
GCAATAGAATCCTAAACTAGCTGG

> S17-M16  
CACTTTCAGCCCTCTTATCCTCGGCGGATCCTTCTAATACGACTCACTATAGGGAGATCGAGCGACTTCCGACTT  
CGGTCGGGAGTCGGGCTAGTCATCTTCGGATGATTAGCCGCTGGTGAAGCCTCCACGCCAGCCTCGGTCTCCCGC  
AGTAGGATCGGACTGAAGGAGGCACGGTCCCAGCCGAAGTGTCTTGCAAGGACGGGTCCCGGTGGCGACTTCGGT  
CGCTACCGGTTGAGTAGAGTGTGAGGCAAGGCACTTTGGCTGCTAGACTGGCTGGTTCGTTGCCGAAGGGACGGTGC  
AGGAGAGCGCCAGCTAGTTTAGGATTCTATTGC  
> rev\_S17  
GCAATAGAATCCTAAACTAGCTGG

> S17-M14  
CACTTTCAGCCCTCTTATCCTCGGCGGATCCTTCTAATACGACTCACTATAGGGAGATCGAGCGACTTCCGACTT  
CGGTCGGGAGTCGGGCTAGTCATCTTCGGATGATTAGCCGCTGGTGAAGCCTCCACGCCAGCCTCGGTCTCCCGC  
AGTAGGATCGGACTGAAGGAGGCACGGTCCCAGCCGAAGTGTCTTGCAAGGACGGGTCCCGGTGGCGACTTCGGT  
CGCTACCGGTTGAGTAGAGTGTGAGGCAAGGCACTTTGGCTGCTAGACTGGCTGGCAGGGACGGTGC  
GAGAGCCAGCTAGTTTAGGATTCTATTGC  
> rev\_S17  
GCAATAGAATCCTAAACTAGCTGG

**Templates (dsDNA gBlocks) and reverse primers for apta-FRET constructs with flipped Spinach:**

> S\*16-M24  
CACTTTCAGCCCTCTTATCCTCGGCGGATCCTTCTAATACGACTCACTATAGGGAGATCTCGCCAGTGATGTCTT  
CGGACATTACTGGGCTCTGGGACTTCGGTCCCGGAGGCGACGGTGAAGCCTCCACGCCGTCGAGGTCTCCCGC  
AGCGTGGCCGACCTGAAGGAGGCACGGGTCCCAGTGATGTGGATCGTTGAGTAGAGTGTGAGGGCTGTCTACTTC  
GGTAGATAGCCAAGGACGGGTCCGATCTACATTACTGGCAGGCACGTGATCGAGGTATCCACGAAGGGACGGTGC  
GGAGAGGAGAGTGGATGCCTCGGTCATGTGTCTGGGCTACGTTGC  
> rev\_S\*16  
GCAACGTAGCCCAGACACAT

> S\*16-M22  
CACTTTTAGCCCTCTTATCCTCGGGCGGATCCTTCTAATACGACTCACTATAGGGAGATCTCGCCAGTGATGTCTT  
CGGACATTACTGGGCCTCTGGGACTTCGGTCCCGGAGGCGACGGTGAAGCCTCCACGCCGTCCGAGGTCTCCCGC  
AGCGTGGCCGACCTGAAGGAGGCACGGGTCCCAGTGATGTGGATCGTTGAGTAGAGTGTGAGGGCTGTCTACTTC  
GGTAGATAGCCAAGGACGGGTCCGATCTACATTACTGGCAGGCACGTGATCGAGGTATCCGAAGGGACGGTGCCG  
AGAGGAGAGGATGCCTCGGTCATGTGTCTGGGCTACGTTGC  
> rev\_S\*16  
GCAACGTAGCCCAGACACAT

> S\*16-M20  
CACTTTTAGCCCTCTTATCCTCGGGCGGATCCTTCTAATACGACTCACTATAGGGAGATCTCGCCAGTGATGTCTT  
CGGACATTACTGGGCCTCTGGGACTTCGGTCCCGGAGGCGACGGTGAAGCCTCCACGCCGTCCGAGGTCTCCCGC  
AGCGTGGCCGACCTGAAGGAGGCACGGGTCCCAGTGATGTGGATCGTTGAGTAGAGTGTGAGGGCTGTCTACTTC  
GGTAGATAGCCAAGGACGGGTCCGATCTACATTACTGGCAGGCACGTGATCGAGGTACGAAGGGACGGTGCCGAG  
AGGAGAGTGCCTCGGTCATGTGTCTGGGCTACGTTGC  
> rev\_S\*16  
GCAACGTAGCCCAGACACAT

> S\*16-M18  
CACTTTTAGCCCTCTTATCCTCGGGCGGATCCTTCTAATACGACTCACTATAGGGAGATCTCGCCAGTGATGTCTT  
CGGACATTACTGGGCCTCTGGGACTTCGGTCCCGGAGGCGACGGTGAAGCCTCCACGCCGTCCGAGGTCTCCCGC  
AGCGTGGCCGACCTGAAGGAGGCACGGGTCCCAGTGATGTGGATCGTTGAGTAGAGTGTGAGGGCTGTCTACTTC  
GGTAGATAGCCAAGGACGGGTCCGATCTACATTACTGGCAGGCACGTGATCGAGGCGAAGGGACGGTGCCGAGAG  
GAGAGCCTCGGTCATGTGTCTGGGCTACGTTGC  
> rev\_S\*16  
GCAACGTAGCCCAGACACAT

> S\*16-M16  
CACTTTTAGCCCTCTTATCCTCGGGCGGATCCTTCTAATACGACTCACTATAGGGAGATCTCGCCAGTGATGTCTT  
CGGACATTACTGGGCCTCTGGGACTTCGGTCCCGGAGGCGACGGTGAAGCCTCCACGCCGTCCGAGGTCTCCCGC  
AGCGTGGCCGACCTGAAGGAGGCACGGGTCCCAGTGATGTGGATCGTTGAGTAGAGTGTGAGGGCTGTCTACTTC  
GGTAGATAGCCAAGGACGGGTCCGATCTACATTACTGGCAGGCACGTGATCGGCGAAGGGACGGTGCCGAGAGGA  
GAGCCGGTCATGTGTCTGGGCTACGTTGC  
> rev\_S\*16  
GCAACGTAGCCCAGACACAT

> S\*16-M14  
CACTTTTAGCCCTCTTATCCTCGGGCGGATCCTTCTAATACGACTCACTATAGGGAGATCTCGCCAGTGATGTCTT  
CGGACATTACTGGGCCTCTGGGACTTCGGTCCCGGAGGCGACGGTGAAGCCTCCACGCCGTCCGAGGTCTCCCGC  
AGCGTGGCCGACCTGAAGGAGGCACGGGTCCCAGTGATGTGGATCGTTGAGTAGAGTGTGAGGGCTGTCTACTTC  
GGTAGATAGCCAAGGACGGGTCCGATCTACATTACTGGCAGGCACGTGACGCGAAGGGACGGTGCCGAGAGGAGA  
GCGTCATGTGTCTGGGCTACGTTGC  
> rev\_S\*16  
GCAACGTAGCCCAGACACAT

**Templates (dsDNA gBlocks) and reverse primers for modified apta-FRET constructs:**

> B\*5-M5  
CACTTTTAGCCCTCTTATCCTCGGGCGGATCCTTCTAATACGACTCACTATAGGGAGAGCCGGCAGGGTCTTCTT  
CGGAAGGGCCCTGGAAGGTTAGTCTTCGGACTAGCCTTCGCCAATGAAGCCTCCACGTTGGCCCGGTTCTCCCTC  
TGTTTCAGTCGCGCTGAAGGAGGCACGGCGCCCTAGTCGAGTAGAGTGTGGGCGGGGCGATCTTCGGATGCTCCCG  
ACGGTCCGGTCTAGGCGACCGAAGGGACGGTGCCGAGAGGAGAGGTCGGATTGAATAGA  
> rev\_B\*5-M5  
TCTATTCAATCCGACCTCTCC

> B\*16-M16  
CACTTTTCAGCCCTCTTATCCTCGGGCGGATCCTTCTAATACGACTCACTATAAGGGAGATCTCGCCAGTGATGTCTT  
CGGACATTACTGGGCCTCTGGGACTTCGGTCCCAGGACGGTGAAGCCTCCACGCCGTCCGAGGTCTCCCGC  
AGCGTGGCCGACCTGAAGGAGGCACGGGTCCCAGTGATGTGGATCGTCGAGTAGAGTGTGGGCGCTGTCTACTTC  
GGTAGATAGCGACGGTCCGGTCCGATCTACATTACTGGCAGGCACGTGATCGGCCAAGGGACGGTGC GGAGAGGA  
GAGCCGGTCATGTGTCTGGGCTACGTTGC

> rev\_S\*16  
GCAACGTAGCCCAGACACAT

> B6-M19  
CACTTTTCAGCCCTCTTATCCTCGGGCGGATCCTTCTAATACGACTCACTATAAGGGAGAGTCCGCGTCCGACGCCTT  
CGGGCGTTGGACGGAGGATCTCGCTTCGGCGAGGTCCGTCGATGAAGCCTCCACGTGACCCGATTCTCCCTA  
TTGTACTTCGGGTTGAAGGAGGCACGACCCCTCGGACGGTCCGCTCTGTATACTTCGGTATATAGAGGT  
GAGTAGAGTGTGGGCCGAGGCCTAGGGCCCACGGCTTCGAAGGGACGGTGC GGAGAGGAGAGAAGCCTGTGGGC  
TCTAGGGAAGTGCAATA

> rev\_B6-M19  
TATTGCACTTCCCTAGAGCC

> S\*5-M5  
CACTTTTCAGCCCTCTTATCCTCGGGCGGATCCTTCTAATACGACTCACTATAAGGGAGAGACCGCCCTCGCTGTCTT  
CGGACAGTGAGGGGGCTGTCTTCTCGGCAGGGCAGCCGATTGTGAAGCCTCCACGCAATCCGGTTTCTCCAC  
GCGGGTTGCGGGTTGAAGGAGGCACGACCCCTGGGTTGAGTAGAGTGTGAGGGGCTACGGCTTCGGCCGTGGCC  
AAGGACGGTCCCCAGCCATCGAAGGGACGGTGC GGAGAGGAGAGATGGGTAACCTGCGT

> rev\_S\*5-M5  
ACGCAGGTTACCCATCTCT

> S6-M19  
CACTTTTCAGCCCTCTTATCCTCGGGCGGATCCTTCTAATACGACTCACTATAAGGGAGATAGAGCATCCGATAACTT  
CGGTTATTGGATGGATCAGACTCCTTCGGGAGTTTGATCGGGCCTGAAGCCTCCACGGGCCCTCTGTCTCCAC  
AGCTTGGACGAGCTGAAGGAGGCACGGCTCCCCATCAAGGACGGTCCAATGGTCCGCTTCGGCGGATCATTTGT  
GAGTAGAGTGTGAGGATGGGCCCGGAGCAGTATAGGTCGAAGGGACGGTGC GGAGAGGAGACCTATGCTGCT  
CTGGGGTCTAAGTTGT

> rev\_S6-M19  
ACAACCTTAGACCCCCAGAG

> S\*5-M5-noKL  
CACTTTTCAGCCCTCTTATCCTCGGGCGGATCCTTCTAATACGACTCACTATAAGGGAGATCTACGAACTGTCCAGTT  
CGCTGGATAGTTCCCTTATAAAAGTTCGCTTTTGTAAGGCAAGATGTTGTCATCTTGGTAGGTCTCCCTTAGAG  
TTGCGGGTTGCTTCGGCGACCCCTGGGTTGAGTAGAGTGTGAGGGGCTACGGCTTCGGCCGTGGCCCAAGGACGG  
GTCCCCAGCCATCGAAGGGACGGTGC GGAGAGGAGAGATGGGTAACCTTTAA

rev\_S\*5-M5-noKL  
TTAAAGGTTACCCATCTCTCCTC

**Templates (dsDNA gBlocks) and reverse primers for conformational change constructs:**

> S\*5-M5-invader1  
CACTTTTCAGCCCTCTTATCCTCGGCAGATCTTCTAATACGACTCACTATAAGGGAGAUUCGAAACUGUCCAGUU  
CGCUGGAUAGUUCUUUAUAAAAGUUCGCUUUUGUAAGGCAAGAUGUCAGACUGGCCACCUUCAACUAGUCUG  
AUAAGCUACAUCUUGGUAGGUCUCCUUAGAGGUUGCGGGUUGAAAGCUUAACGACCCUUGGUUGAGUAGAGUG  
UGAGGGGCUACGGCUUCGGCCGUGGCCAAGGACGGGUCCCCAGCCAUCGAAGGGACGGUUGCGGAGAGAGAGAU  
GGGUAACUUUA

> rev\_S\*5-M5-noKL  
TTAAAGGTTACCCATCTCTCCTC

```

> S*5-M5-invader2
CACTTTTCAGCCCTCTTATCCTCGGCAGATCTTTCTAATACGACTCACTATAAGGGAGAUCUACGAACUGUCCAGUU
CGCUGGAUAGUUCUUUUUUUUUUUUUUUUUUUUUUUUUUUUUUUUUUUUUUUUUUUUUUUUUUUUUUUUUUUUUUUUUU
AGUCUAGACAUCUUGGUAGGUCUCCUUUAGAGGUUUCGGGUUGAACUAGACACGACCCCUUGGUUUGAGUAGAGUG
UGAGGGGCUACGGCUUCGGCCGUGGCCAAGGACGGGUCCCCAGCCAUCGAAGGGACGGUGCGGAGAGGAGAGAU
GGGUAACUUUUA
> rev_S*5-M5-noKL
TTAAAGGTTACCCATCTCTCCTC

> S6-M19-SAM
CACTTTTCAGCCCTCTTATCCTCGGCAGATCCTTTCTAATACGACTCACTATAAGGGAGATAGAGCATCCGATAACTT
CGGTTATTGGATGGATCAGACTCCTTCGGGAGTTTGATCGGGCTGAAGCCTCCACGGGCCCTCTGTCTCCCAC
AGCTTGGACGAGCTGAAGGAGGCACGGCTCCCCATCAAGGACGGGTCCAATGGTCCGCTTCGGCGGATCATTGTT
GAGTAGAGTGTGAGGATGGGCCGGGGAACTTCGGTTCCCGAAAGGACCGGTGCAAGGGACGGTTCGGGAGAGGAG
AGACTGGGATGCCTTGTAACCGGGTCTAAGTTGT
rev_S6-M19-SAM
ACAACCTTAGACCCGGTTACAAG

```

**Templates (dsDNA gBlocks) and reverse primers for structures used in vivo:**

**Forward primer for all designs used in vivo:**

```

> Universal_Fwd - BglII
CGGCAGATCTTTCTAATACGACTCACTATAGGG

> S*5-M5
CACTTTTCAGCCCTCTTATCCTCGGCAGATCCTTTCTAATACGACTCACTATAAGGGAGAGACCGCCCTCGCTGTCTT
CGGACAGTGAGGGGGCTGTCTTCTCGGCAGGGCAGCCGATTGTGAAGCCTCCACGCAATCCGGTTTCTCCCAC
GCGGGTTGCGGGTTGAAGGAGGCACGACCCCTGGGTTGAGTAGAGTGTGAGGGGCTACGGCTTCGGCCGTGGCC
AAGGACGGGTCCCAGCCATCGAAGGGACGGTTCGGAGAGGAGAGATGGGTAACCTGCCG
> rev_S*5-M5-EcoRI
CGTAGAATTCACGCAGGTTACCCATCTCTC

> B*5-M5_v2
CACTTTTCAGCCCTCTTATCCTCGGCAGATCTTTCTAATACGACTCACTATAAGGGAGAGCCGGCACGTGACTACTT
CGGTAGTTACGTGGGCTATGAACTTCGGTTTTCGTAGCCGCCGGTGAAGCCTCCACGCCGGCCCGGTTCTCCCGC
TGCGTTGGCGAAGTGAAGGAGGCACGGTTCACAGGTCGAGTAGAGTGTGGGCGTAGGCGACTTCGGTCGCTTACG
ACGGTTCGGTCCCTGGCCGCCAAGGGACGGTTCGGAGAGGAGAGGCGGGCTAACGTAGCGAATTCCTTAAC
> rev_B*5-M5_v2_EcoRI
GTTAAGGAATTCGCTACGTTAGC

> 2H-AE-F30
CGGCAGATCTTTCTAATACGACTCACTATAAGGGAGATACTCTGATGATCACGGTCCCAGTTACATTCGTGTAGCT
GGCCTAGCTAATTCGTTAGTTAGGGGTGGTGAAGCCTCCACGCCACCGACCGGATCATTTCATGGCAATGCGACTG
AAGGAGGCACGGTTCGGCCATCCGTTTCGACGGGTGGCGGTAGAGCCTTCGGGCTTTACCCATTGCCATGTGTATC
TCCCAACCCCGCGGGGCTCTTCGGGGGTCTCGCGGGGTTTTTTGCTCGTAGAATTCCTTAAC
> rev-2H-AE-F30-EcoRI
GTTAAGGAATTCACGAGCAAAAAACCCCGCG

> S(-31)-M30
CACTTTTCAGCCCTCTTATCCTCGGCAGATCCTTTCTAATACGACTCACTATAAGGGAGATCGAGCGACTTCCGACTT
CGGTCGGGAGTCGCCGTGCGGTAAGGACGGTCCCTAGCTAATTCGTTAGTTAGTTGAGTAGAGTGTGAGACCG
TACGGGCTGGTGAAGCCTCCACGCCAGCCTCGGTCTCCCGCAGTAGGATCGGACTGAAGGAGGCACGGTCCCAGC
CGAAGTGTCTTGCTTCGGCAAGGCACTTTGGCTGCTAGACTGGCTGGTTCGTTTCGATACGCAGCGAAGGGACGGT
GCGGAGAGGAGAGCTGCGTGTGCAACGGACCAGCTAGTTTAGGATTCCTATTGC
> rev_S-M30-EcoRI
CGTAGAATTCGCAATAGAATCCTAAACTAGCT

```
